# Supplementary material for: Insights into the evolution of sialic acid catabolism among bacteria
Source: PubMed Central journal article supplement (PMC2693436; doi:10.1186/1471-2148-9-118), 2009-05-26

# NanA ML tree

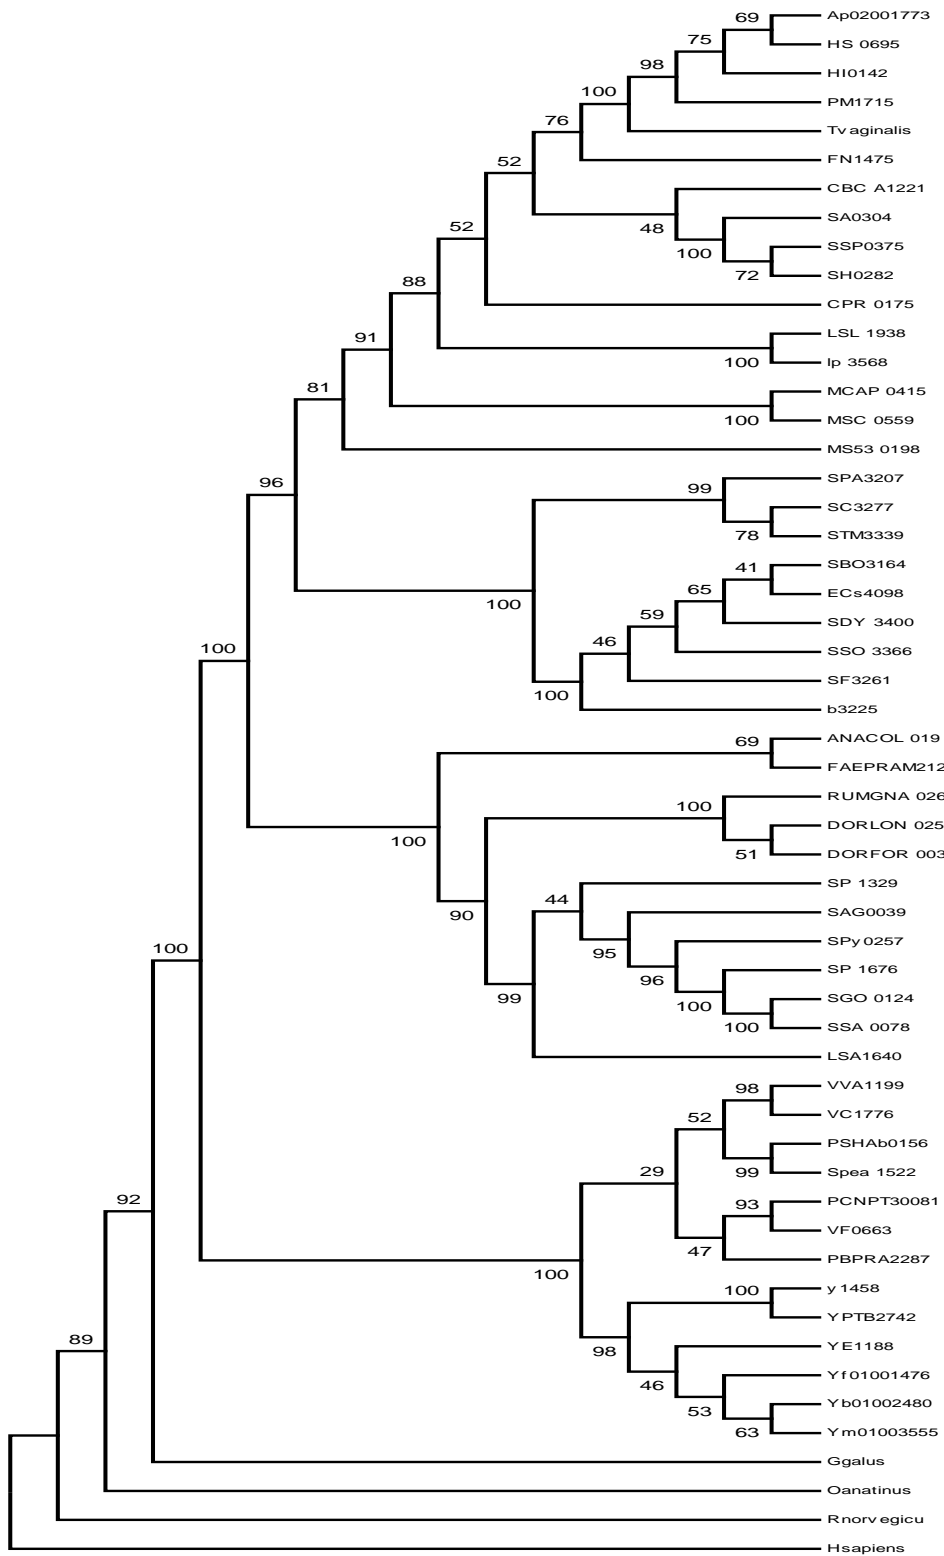

Supplement: 1471-2148-9-118-S4.pdf [file 1471-2148-9-118-S4.pdf]
